# Supplementary material for: LSD1 co-repressor Rcor2 orchestrates neurogenesis in the developing mouse brain
Source: PubMed Central journal article supplement (PMC4736047; doi:10.1038/ncomms10481), 2016-01-22
Supplement: ncomms10481-s1.pdf [file ncomms10481-s1.pdf]

Supplementary Figure 1

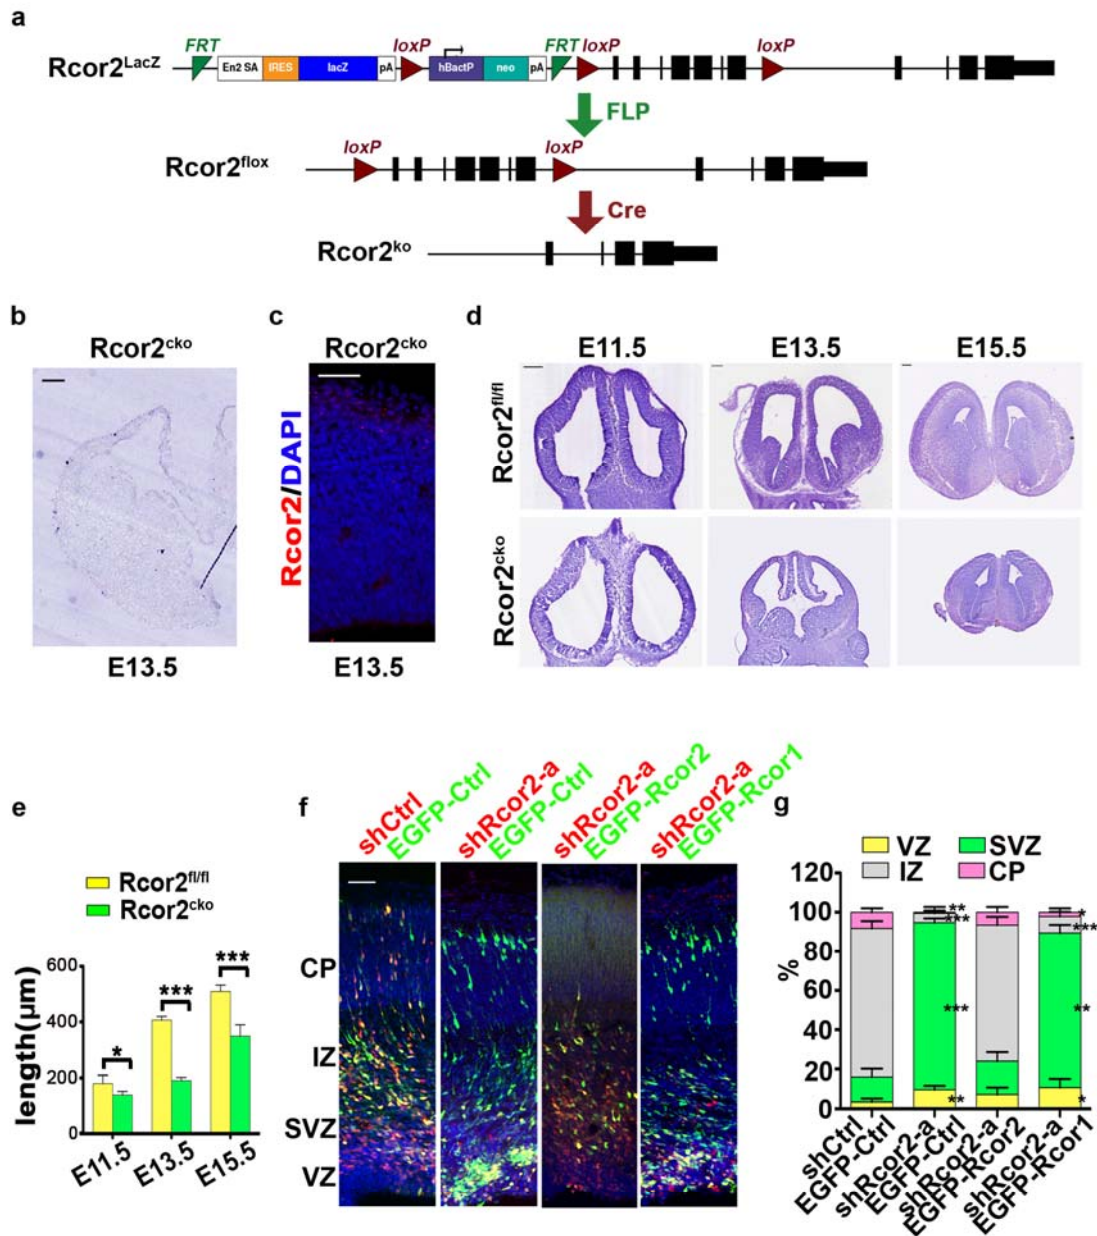

Supplementary Figure 1-Wang

**Supplementary Fig. 1:** *Rcor2* expresses in the central nervous system (CNS), regulating cortical development.

(a) Schematic of *Rcor2*-trapped mice construction strategy. A LacZ reporter cassette, flanked by two FRT sequences, is inserted ahead of the first exon to disrupt *Rcor2* expression in the *Rcor2*<sup>LacZ</sup> mice. Two LoxP sites are inserted between the first several exons in these mice. The LacZ reporter cassette can be removed by Flippase splicing, and the *Rcor2* gene can be

knocked out in different tissues by tissue-specific Cre recombinase splicing.

- (b) Representative image of *in situ* hybridization in Rcor2<sup>cko</sup> brain sections at E13.5. Scale bar, 100 $\mu$ m.
- (c) Representative immunostaining of Rcor2<sup>cko</sup> brain section at E13.5 using Rcor2 antibody. Scale bar, 50 $\mu$ m.
- (d) Nissl staining of Rcor2<sup>fl/fl</sup> and Rcor2<sup>cko</sup> brains at different stages. Representative images of Rcor2<sup>fl/fl</sup> and Rcor2<sup>cko</sup> brain slices show cortical hypoplasia with reduced thickness in Rcor2<sup>cko</sup> neocortex. Scale bar, 200 $\mu$ m.
- (e) Histograms depicting quantitative changes in cortical thickness between Rcor2<sup>fl/fl</sup> and Rcor2<sup>cko</sup> developing neocortex. Y-axis, lengths of cortical thickness. Data are shown as mean  $\pm$  S.E.M., t test, \* p<0.05, \*\*\* p<0.001, n=3 separate staining from 3 independent brains.
- (f) Representative images of E16.5 cerebral sections electroporated with RFP-shControl (red)/EGFP-Control (green), RFP-shRcor2 (red) /EGFP-Control (green), RFP-shRcor2 (red) /EGFP-mRcor2 (green), or RFP-shRcor2 (red) /EGFP-mRcor1 (green) plasmids at E13.5. VZ, ventricular zone; SVZ, sub-ventricular zone; IZ, intermediate zone; CP, cortical plate. Scale bar, 20 $\mu$ m.
- (g) Quantification of the percentage of RFP<sup>+</sup>/EGFP<sup>+</sup> cells in different regions of the developing neocortex after electroporation shown as (f). Y-axis, percentage of RFP<sup>+</sup>/EGFP<sup>+</sup> cells in different zones. Data are shown as mean  $\pm$  S.E.M., t test, \*p < 0.05, \*\* p < 0.01, \*\*\* p < 0.001, n=3.

Supplementary Figure 2

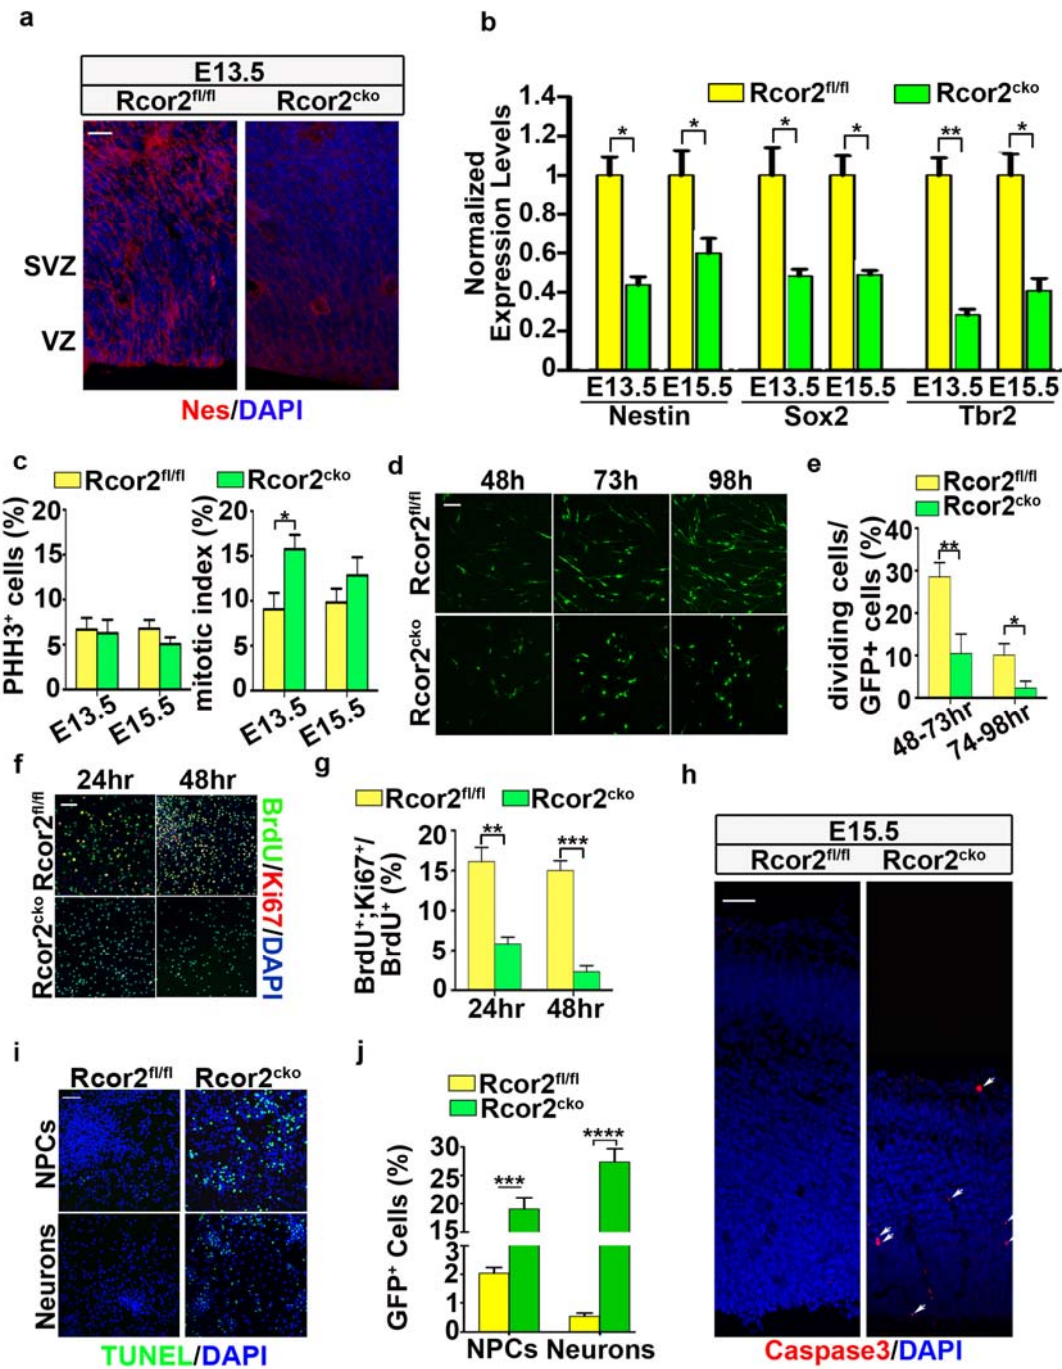

Supplementary Figure 2 - Wang

**Supplementary Fig. 2:** Cortical NSC/NPC population and proliferation are affected upon Rcor2 depletion both *in vivo* and *in vitro*.

(a) Confocal images of Nestin immunostaining at E13.5. Sox2 and Tbr2 are dramatically reduced upon Rcor2 depletion. VZ, ventricular zone; SVZ, sub-ventricular zone. Scale bar, 20  $\mu$ m.

(b) RT-qPCR analysis of Nestin, Sox2 and Tbr2 expression levels in both  $Rcor2^{fl/fl}$  and  $Rcor2^{cko}$

neocortex at E13.5 and E15.5. Transcripts were normalized to the Rcor2<sup>fl/fl</sup> group. Data are shown as mean  $\pm$  S.D., t test, \*p < 0.05, \*\* p < 0.01, n=3.

- (c) Quantification of PHH3<sup>+</sup> cells (left panel) and mitotic index (right panel) in the VZ/SVZ regions of the developing neocortex as shown in Fig. 2f. Data are shown as mean  $\pm$  S.E.M., t test, n=3 separate stainings from three independent brains.
- (d) Time lapse analysis of cultured Rcor2<sup>fl/fl</sup> and Rcor2<sup>cko</sup> NPCs after labeling dividing cells with retro-GFP. Scale bar, 100 $\mu$ m.
- (e) Quantification of cell division abilities as shown in (d) is calculated by the percentage of dividing cell number in all GFP<sup>+</sup> cell number at 48-73 hrs and 74-98 hrs after virus infection in Rcor2<sup>fl/fl</sup> and Rcor2<sup>cko</sup> NPCs. Y-axis, ratio of dividing cells among GFP<sup>+</sup> cells. Data are shown as mean  $\pm$  S.E.M., t test, \*p < 0.05, \*\* p < 0.01, n=5 from 3 individual experiments.
- (f) Confocal images of BrdU (green) and Ki67 (red) staining in *in-vitro* cultured Rcor2<sup>fl/fl</sup> and Rcor2<sup>cko</sup> NPCs 24 hrs and 48 hrs after BrdU incubation. Scale bar, 100 $\mu$ m.
- (g) Quantification of the cell cycle exit by percentage of BrdU<sup>+</sup> and Ki67<sup>+</sup> NPCs divided by BrdU<sup>+</sup> cells shown in (f). Data are shown as mean  $\pm$  S.E.M., t test, \*\*p < 0.01, \*\*\* p < 0.001, n=3.
- (h) Confocal images of Caspase 3 staining in Rcor2<sup>fl/fl</sup> and Rcor2<sup>cko</sup> cortex at E15.5. Arrows: Caspase 3<sup>+</sup> cells. Scale bar, 100 $\mu$ m.
- (i-j) Representative images of TUNEL staining in Rcor2<sup>fl/fl</sup> and Rcor2<sup>cko</sup> NPCs and neurons (i), and quantification of GFP<sup>+</sup> cells in the TUNEL assays (j). Data are shown as mean  $\pm$  S.E.M., t test, \*\*\* p < 0.001, \*\*\*\* p < 0.0001, n=3. Scale bar, 50 $\mu$ m.

Supplementary Figure 3:

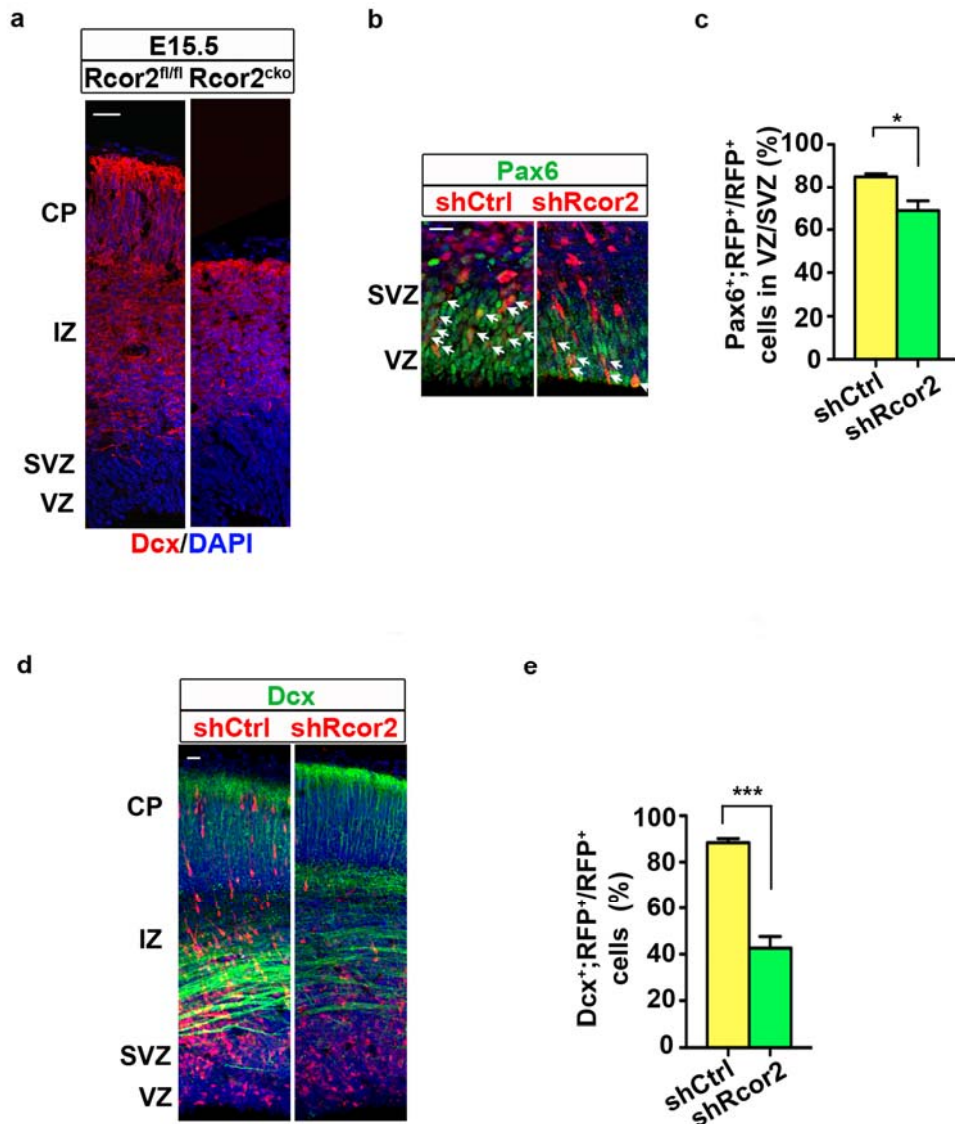

Supplementary Figure 3 - Wang

**Supplementary Fig. 3:** Neurogenesis is affected upon Rcor2 depletion during cortical development.

(a) Confocal images of Dcx expressions in Rcor2<sup>fl/fl</sup> and Rcor2<sup>cko</sup> cortex at E15.5, which exhibit significant reduction upon Rcor2 knock-out. Scale bar, 50  $\mu$ m.

(b) Representative images of E16.5 cerebral sections electroporated with RFP-shControl (red) or RFP-shRcor2 (red) plasmids at E13.5 and immunostained with Pax6 (green). VZ, ventricular

zone; SVZ, sub-ventricular zone. Arrows: RFP<sup>+</sup>Pax6<sup>+</sup> cells; Scale bar, 20μm.

(c) Quantification of the percentage of RFP<sup>+</sup>Pax6<sup>+</sup>/RFP<sup>+</sup> cells in VZ and SVZ as shown in (b). Data are shown as mean ± S.E.M., t test, \*p < 0.05, n=3.

(d) Representative images of E16.5 cerebral sections electroporated with RFP-shControl (red) or RFP-shRcor2 (red) plasmids at E13.5 and immunostained with Dcx (green). VZ, ventricular zone; SVZ, sub-ventricular zone; IZ, intermediate zone; CP, cortical plate. Scale bar, 20μm.

(e) Quantification of the percentage of RFP<sup>+</sup>Dcx<sup>+</sup>/RFP<sup>+</sup> cells in developing neocortex as shown in (d). Data are shown as mean ± S.E.M., t test, \*\*\*p < 0.001, n=3.

Supplementary Figure 4:

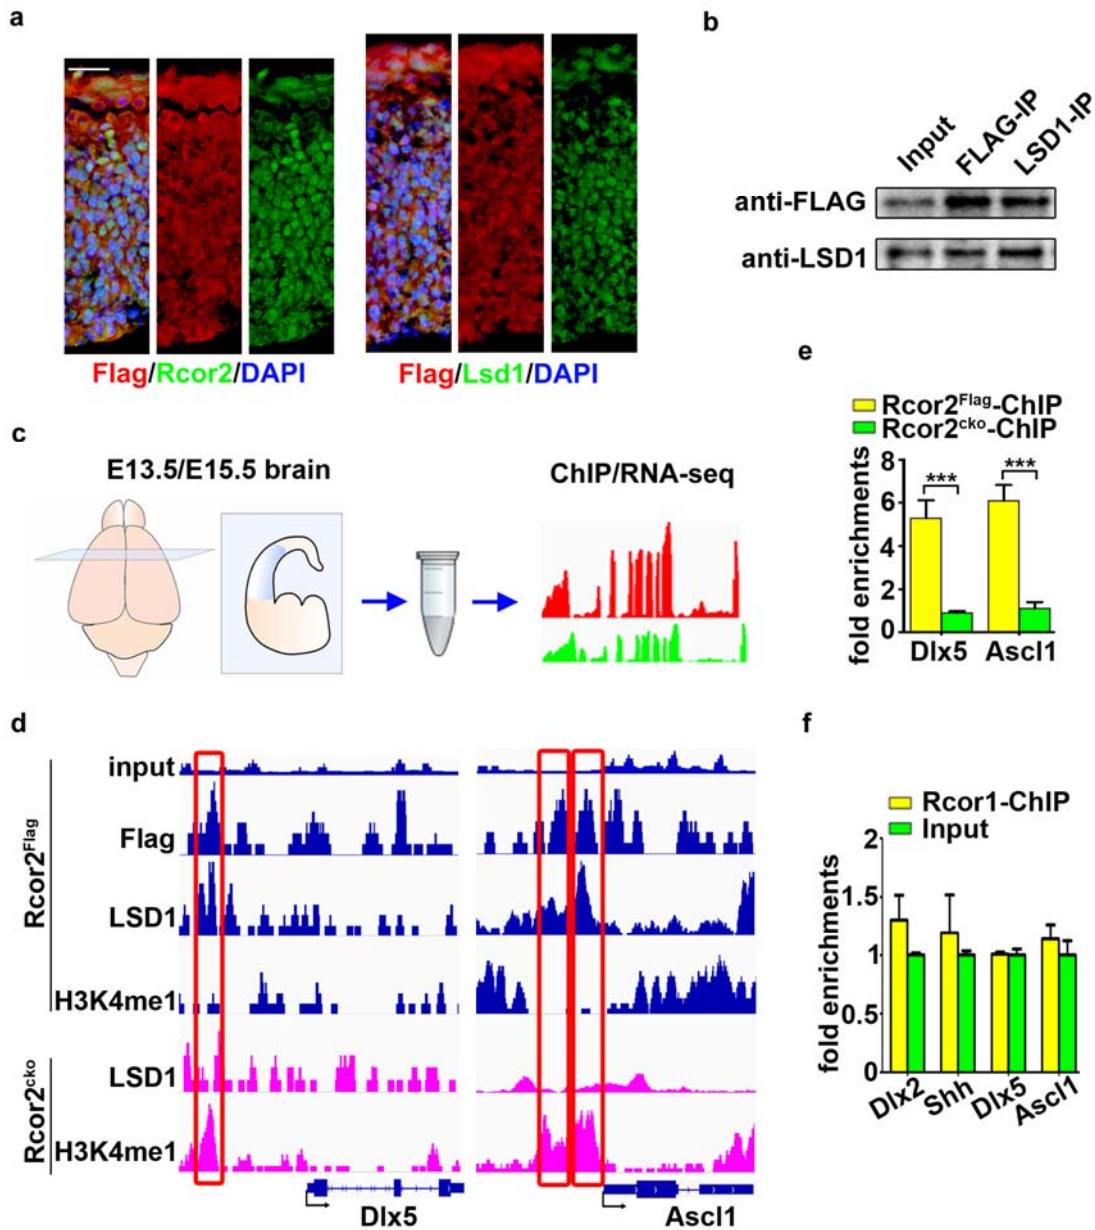

Supplementary Figure 4 - Wang

**Supplementary Fig. 4:** ChIP-seq analysis of Rcor2 enrichments in genome-wide scale using Rcor2<sup>Flag</sup> neocortex.

- (a) Representative images of Rcor2<sup>Flag</sup> neocortical section at E11.5 using Flag-M2, Lsd1 and Rcor2 antibodies. Note Flag co-immunostained with RCOR2, were co-expressed with LSD1 in nuclei of neocortex. Scale bar, 50 $\mu$ m.

- (b) Western blot analysis for Rcor2<sup>Flag</sup> brain lysis at E13.5 (input) or the samples derived from anti-FLAG and anti-LSD1 immunoprecipitation using Flag M2 and Lsd1 antibodies.
- (c) Schematic of sample preparation for ChIP-seq and RNA-seq using Rcor2<sup>fl/fl</sup> and Rcor2<sup>cko</sup> neocortex at E13.5 or E15.5. Embryonic brains were embedded in low-melting-point agarose and sectioned. The tissue marked with light blue color in the brain slice model was isolated for sequencing.
- (d) Gene tracks of Rcor2, LSD1 and H3K4me1 enrichments by ChIP-seq analysis at upstream regulatory regions of Dlx5 and Ascl1, which are both related to Shh signaling pathway.
- (e) ChIP-qPCR analysis of Rcor2<sup>flag</sup> and Rcor2<sup>cko</sup> cortex at E13.5 using specific FLAG-M2 antibody. Note significant enrichments of the Rcor2 at the occupancy region upstream of Dlx5 and Ascl1 gene locus detected in (d) in the Rcor2<sup>Flag</sup> samples. Y-axis, fold enrichments of Rcor2 occupancy compared to input. Data are shown as mean  $\pm$  S.D., t test, \*\*\* p < 0.001, n=3.
- (f) ChIP-qPCR analysis of Rcor2<sup>fl/fl</sup> cortex at E13.5 using specific Rcor1 antibody. No significant enrichments of Rcor1 at Rcor2 binding regions upstream of Dlx2, Shh, Dlx5 and Ascl1 gene locus. Y-axis, fold enrichments of Rcor1 occupancy compared to input. Data are shown as mean  $\pm$  S.D., t test, n=3.



Supplementary Figure 5:

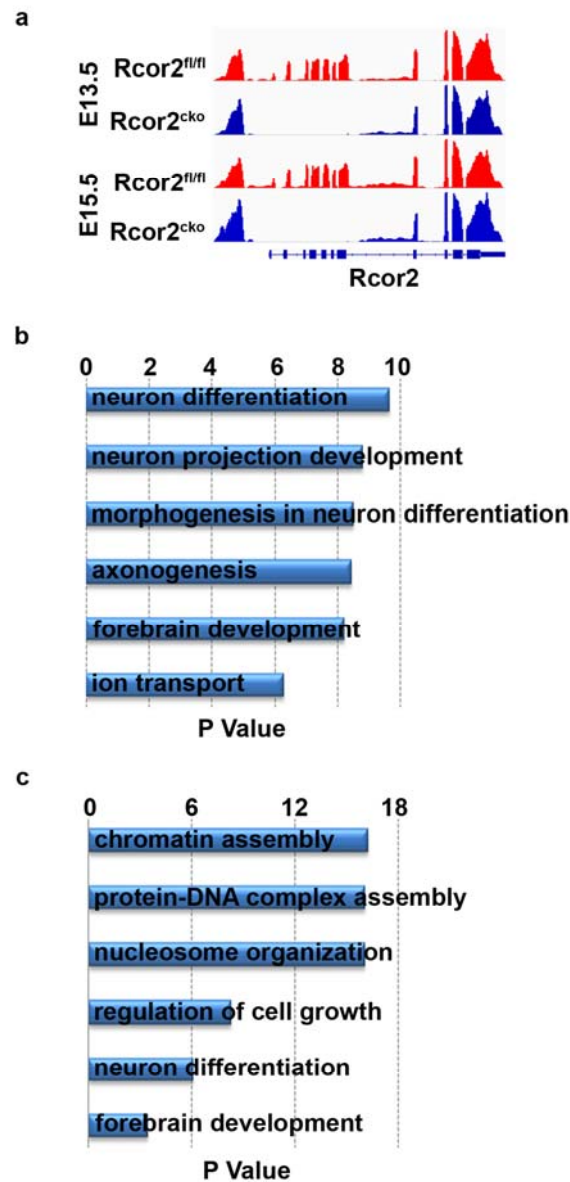

Supplementary Figure 5 - Wang

**Supplementary Fig. 5:** RNA-seq analysis for genome-wide expression changes upon Rcor2 disruption in the developing cortex.

- (a) Transcription profiles at Rcor2 gene locus in Rcor2<sup>fl/fl</sup> and Rcor2<sup>cko</sup> cortex samples prepared as shown in Supplementary Fig. 4c. Note that RNA peaks of the exons between the two LoxP sites are absent in Rcor2<sup>cko</sup> E13.5 and E15.5 cortex.
- (b) GO analysis for 78 genes down-regulated at E13.5 upon Rcor2 depletion.
- (c) GO analysis for 93 genes down-regulated at E15.5 upon Rcor2 depletion.

Supplementary Figure 6:

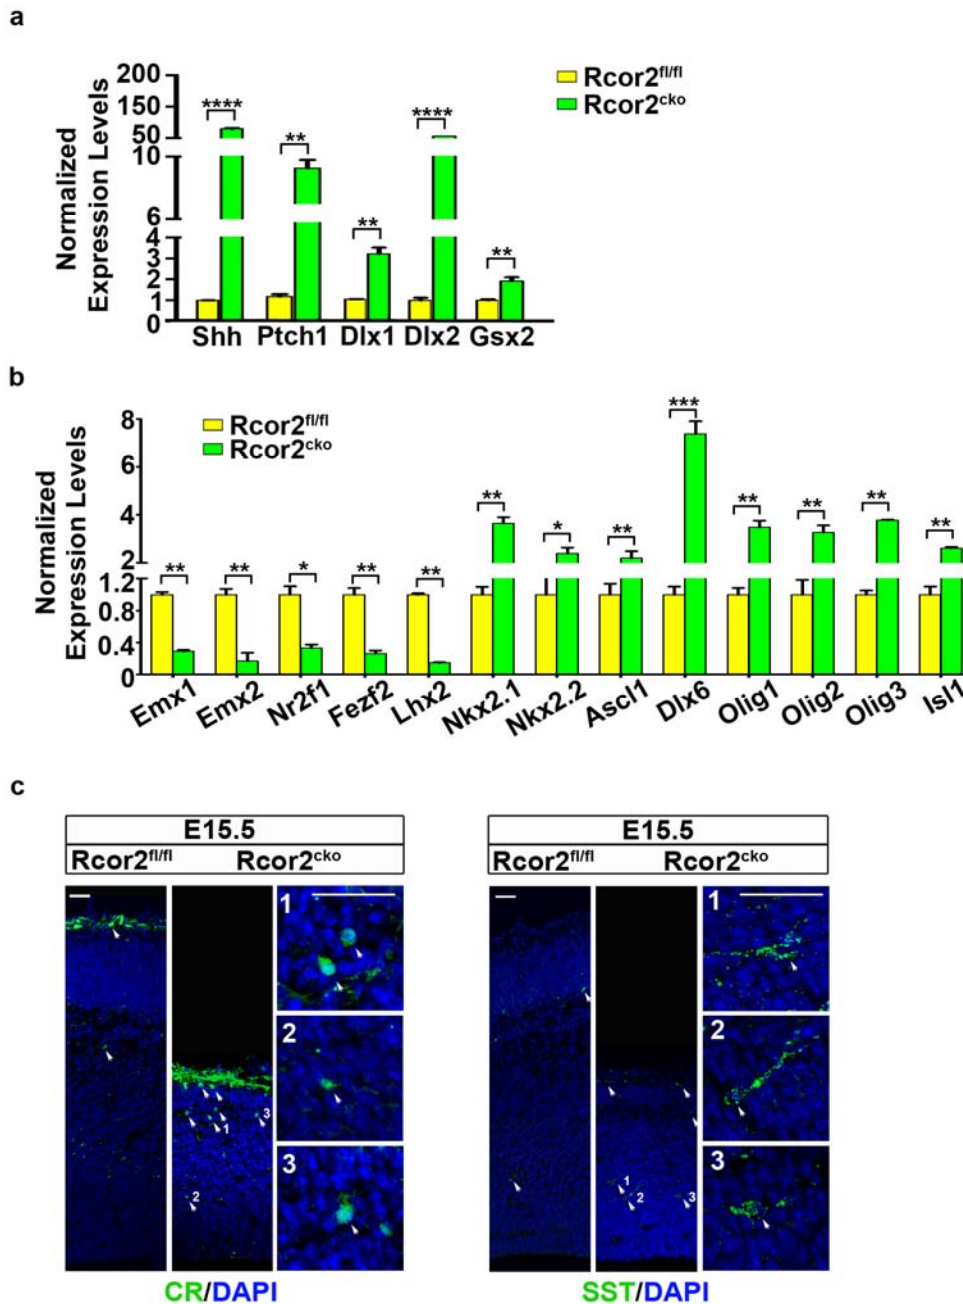

Supplementary Figure 6 - Wang

**Supplementary Fig. 6:** Rcor2 regulates Shh signaling pathway and dorsal-ventral specification during cortical development.

(a) RT-qPCR analysis of expression of genes involved in Shh signaling pathway in cultured Rcor2<sup>fl/fl</sup> and Rcor2<sup>cko</sup> NPCs *in vitro*. Transcripts were normalized to the Rcor2<sup>fl/fl</sup> group. Data are shown as mean ± S.D., t test, \*\* p < 0.01, \*\*\*\* p < 0.0001, n=3.

(b) RT-qPCR analysis of expression of genes involved in dorsal-ventral specification in Rcor2<sup>fl/fl</sup>

and Rcor2<sup>cko</sup> neocortex at E15.5. Transcripts were normalized to the Rcor2<sup>fl/fl</sup> group. Data are shown as mean  $\pm$  S.D., t test, \*p < 0.05, \*\* p < 0.01, \*\*\* p < 0.001, n=3.

(c) Confocal images of CR (calretinin) and SST (somatostatin) expressions in Rcor2<sup>fl/fl</sup> and Rcor2<sup>cko</sup> cortex at E15.5. Enhanced Calretinin and SST signals are observed in Rcor2<sup>cko</sup> compared to Rcor2<sup>fl/fl</sup> neocortex. Scale bar, 50  $\mu$ m. Arrows: CR<sup>+</sup> or SST<sup>+</sup> cells.

Supplementary Figure 7:

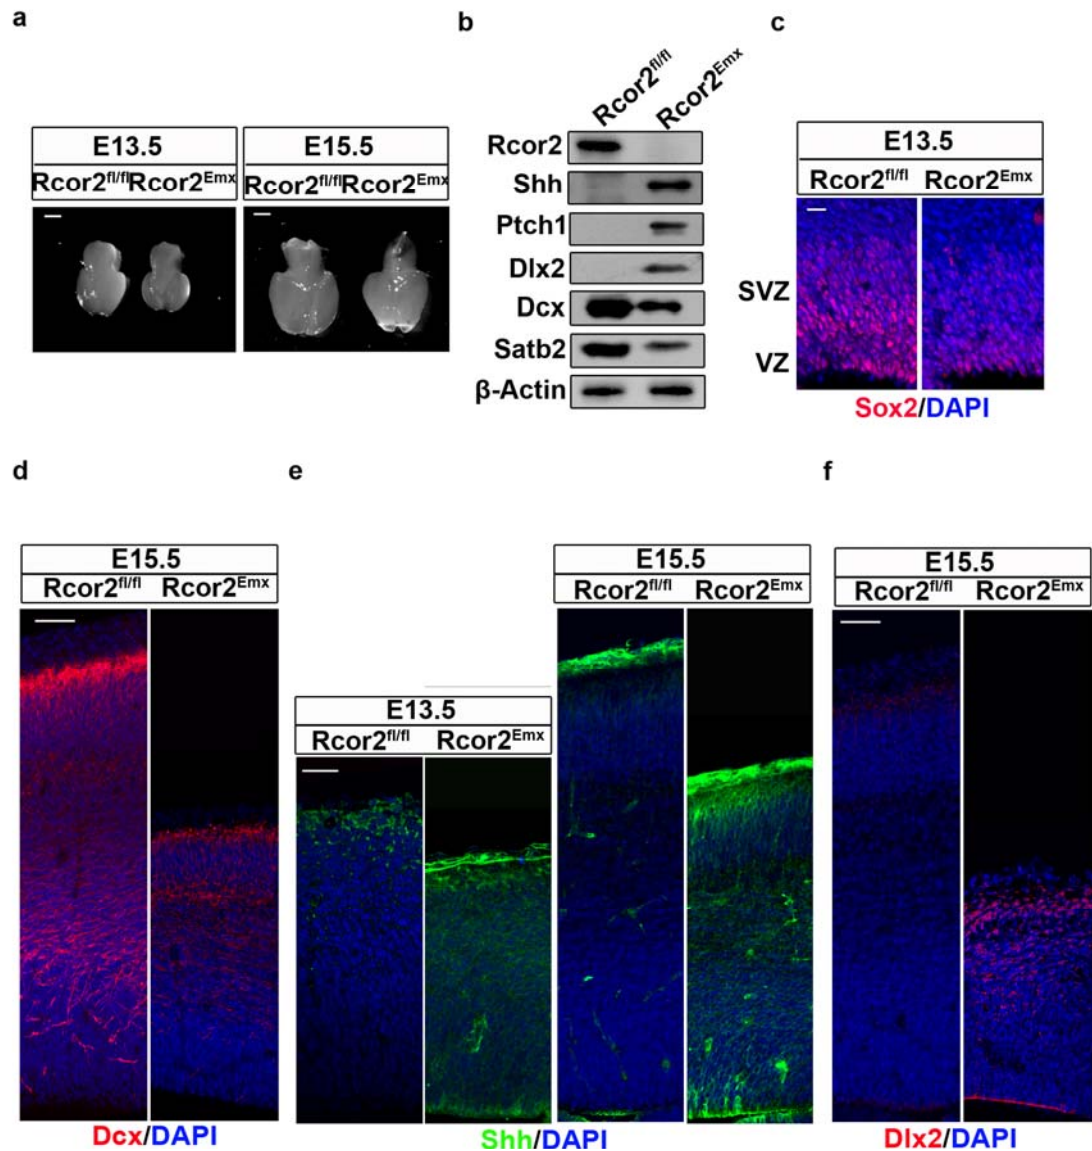

Supplementary Figure 7 - Wang

**Supplementary Fig. 7:** Characteristics of developing neocortex upon Rcor2 depletion in dorsal neuronal progenitor cells

(a) Representative images of Rcor2<sup>fl/fl</sup> and Rcor2<sup>Emx</sup> (generated by Emx1-Cre allele) brain size at different stages of development. Growth retardation is observed in brains upon cortical knockout of Rcor2 at E13.5 and E15.5. Scale bar, 1 mm.

(b) Western blot analysis of expression levels of Rcor2, Shh, Ptch1, Dlx2, Dcx and Satb2 in

Rcor2<sup>fl/fl</sup> and Rcor2<sup>Emx</sup> cortex at E15.5.  $\beta$ -Actin is used as an endogenous control.

(c) Immunostaining images of Sox2 in Rcor2<sup>fl/fl</sup> and Rcor2<sup>Emx</sup> cortex at E13.5. VZ, ventricular zone; SVZ, sub-ventricular zone. Scale bar, 20 $\mu$ m.

(d-f) Confocal images of Dcx (d), Shh (e) and Dlx2 (f) expressions in Rcor2<sup>fl/fl</sup> and Rcor2<sup>Emx</sup> cortex during development, which exhibit significant reduction upon Rcor2 knock-out. Scale bar, 50  $\mu$ m.

**Supplementary Figure 8:**

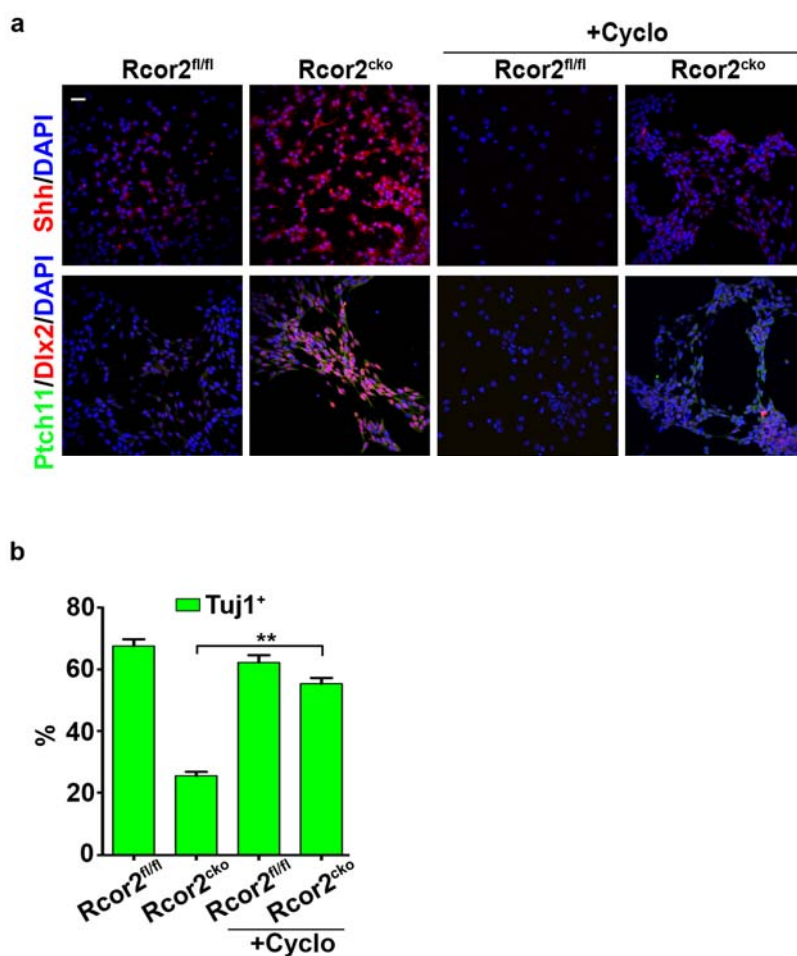

**Supplementary Figure 8 - Wang**

**Supplementary Fig. 8:** Inhibition of Shh partially rescues the proliferation and neuronal differentiation defects caused by Rcor2 disruption.

- (a) Confocal images of Shh, Ptch1 and Dlx2 expressions in *in-vitro* cultured Rcor2<sup>fl/fl</sup> and Rcor2<sup>cko</sup> NPCs before and after Cyclopamine treatment for 48 hrs. Inhibition of Shh significantly down-regulates the expression levels of Shh, Ptch1 and Dlx2 in cultured Rcor2<sup>cko</sup> NPCs. Scale bar, 20  $\mu$ m.
- (b) Quantification of Tuj1<sup>+</sup> cell ratios in *in-vitro* cultured Rcor2<sup>fl/fl</sup> and Rcor2<sup>cko</sup> NPCs before and after Cyclopamine treatment during differentiation as shown in Fig. 7g. Y-axis, proportion of Tuj1<sup>+</sup> cell. Data are shown as mean  $\pm$  S.D., t test, \*\* p < 0.01, n=3 independent stainings.

**Supplementary Figure 9:**

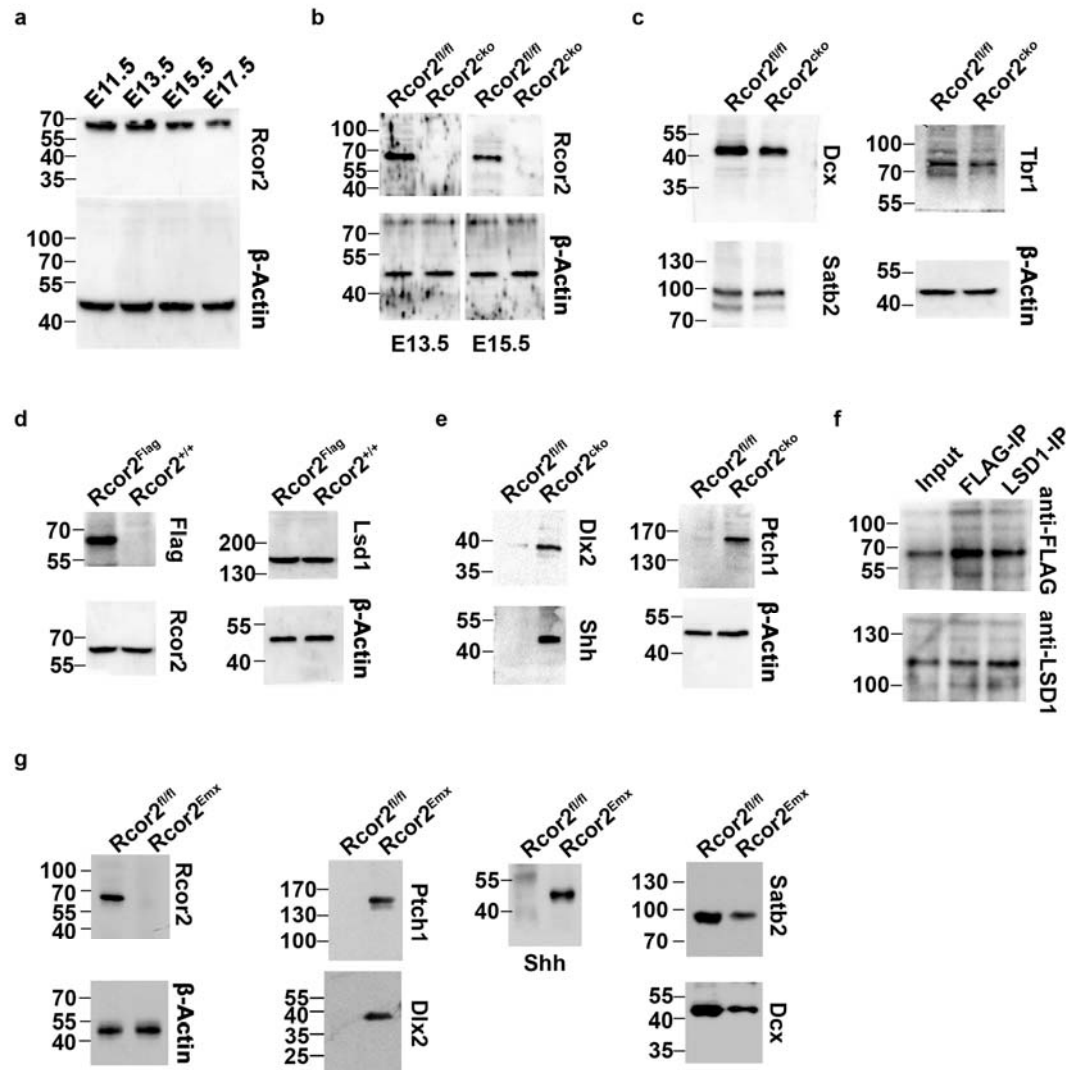

**Supplementary Figure 9-Wang**

**Supplementary Fig. 9:** Full-size scans of western blot results shown in main and supplementary figures. Panel a is accordance with Fig. 1b; panel b is accordance with Fig. 1e; panel c is according to Fig. 3c; panel d is according to Fig. 4b; panel e is accordance with Fig. 6e; panel f is accordance with Supplementary Fig. 4b.

**Supplementary Table 1: Primer sequences**

| Name        | Sequences (5'-3')                                               |
|-------------|-----------------------------------------------------------------|
| shRcor2-a-F | TGCCTGGTGAAGTATTACTATTCAAGAGATAGTAATACTTCAC<br>CAGGCTTTTTTC     |
| shRcor2-a-R | TCGAGAAAAAAGCCTGGTGAAGTATTACTATCTCTTGAATAGT<br>AATACTTCACCAGGCA |
| shRcor2-b-F | TGTCGAACTAGTGTGATGGATTCAAGAGATCCATCACACTAGT<br>TCGACTTTTTTC     |
| shRcor2-b-R | TCGAGAAAAAAGTCGAACTAGTGTGATGGATCTCTTGAATCC<br>ATCACACTAGTTCGACA |
| Rcor2-RT-F  | GCTGAAGGGAATGCTGGTGTG                                           |
| Rcor2-RT-R  | CAGGGAAGGGAGTGAAGTTGG                                           |
| Satb2-RT-F  | TCTTTTGGGTCTAACCGTCCTAC                                         |
| Satb2-RT-R  | TTTCCTTCACTGACTCCCCTGCT                                         |
| Map2-RT-F   | AGAAACGTTCTTCCCTCCCAA                                           |
| Map2-RT-R   | AAATCCTAACCTGACCCCCCT                                           |
| Tubb3-RT-F  | AGAACAGCAGCTACTTCGTGG                                           |
| Tubb3-RT-R  | TCATCTTCATACATCTCCCCCT                                          |
| Mapt-RT-F   | GGAAATGACGAGAAGAAAGC                                            |
| Mapt-RT-R   | TGTTGGTAGGGATGGGGTGC                                            |
| Pou4f1-RT-F | AGTTTCGAGTCGCTCACGCTCT                                          |
| Pou4f1-RT-R | TTTCATCCGCTTCTGCTTCTGT                                          |
| Syn3-RT-F   | GTGAATGGCGACATTGAGATC                                           |
| Syn3-RT-R   | ATTGGCTTGTGGTTGGGGAAA                                           |
| Syt13-RT-F  | CGCCATAGTGTGATTGGGGAA                                           |
| Syt13-RT-R  | GGATTGGTTGGAGTGGAGGTT                                           |
| Nefl-RT-F   | CCAGCCTACTATAACCAGCCACGT                                        |
| Nefl-RT-R   | CCTCCTCTTCTGCTTCTCCTTCA                                         |
| Nefm-RT-F   | GCACTACTTGGAACAACAGAA                                           |
| Nefm-RT-R   | ACCTTAACCATCGACGACTCT                                           |
| Stmn2-RT-F  | CCGCGCAACATCAACATCTAC                                           |
| Stmn2-RT-R  | TGCTCCCTCTTCTCTGCCAAC                                           |
| Omg-RT-F    | ATCCTCTTCCACCGCATCCCTT                                          |
| Omg-RT-R    | CTGCCGAGTAGGGTAGGATAA                                           |
| Nestin-RT-F | CTACCTACCCCTCCCCCATTCAT                                         |
| Nestin-RT-R | CTCACCTACCTTACGTCCTCGA                                          |
| Pax6-RT-F   | CGTGTGGCTCCCTCTTATTCTTT                                         |
| Pax6-RT-R   | GGCTTGTATGCGTTTGTGGTTT                                          |
| Sox2-RT-F   | TCTCACTGCCATCTAACACTG                                           |
| Sox2-RT-R   | CTTTTCTTGCTCCACACCTAC                                           |
| Emx1-RT-F   | GTGCTTCGGAATCGCTTCTTT                                           |



|             |                          |
|-------------|--------------------------|
| Emx1-RT-R   | TCCAGCTTCTGCCGTTTGTAT    |
| Emx2-RT-F   | GTCCCATAAATCCGTTCTCAA    |
| Emx2-RT-R   | GGTTCTTCTCAAAGCGTGCTC    |
| Nr2f1-RT-F  | AAGAAGGAGTTCGTGTGCCG     |
| Nr2f1-RT-R  | CTCATTGGAGTGAGTGCGGTTC   |
| Fezf2-RT-F  | ACAGAGCAAGCCCACAAGCGA    |
| Fezf2-RT-R  | ATCAAGCCAGCGGCACACGAAC   |
| Olig1-RT-F  | CCGACGCCAAAGAGGAACAG     |
| Olig1-RT-R  | TGCCGAGTAGGGTAGGATAA     |
| Olig2-RT-F  | TGGTGTCTAGTCGCCCATCGT    |
| Olig2-RT-R  | TCATCTGCTTCTTGTCTTTC     |
| Olig3-RT-F  | AGATGAAGAGGTTGGTTGGA     |
| Olig3-RT-R  | TGAGCAAGTCCTTGGATTCA     |
| Shh-RT-F    | GTTTTCTGGTGATCCTTGCTT    |
| Shh-RT-R    | CACTGCTCGACCCTCATAGTG    |
| Ptch1-RT-F  | TCTTGCTCTTGGTGTGGTGTGG   |
| Ptch1-RT-R  | CGGGTGTTACTGTGAGGCTCTGT  |
| Isl1-RT-F   | CACCCTACCTCTGTCTATTCGC   |
| Isl1-RT-R   | GCACCCTTGTCTGGTTTTACCT   |
| Nkx2.1-RT-F | CGAGCGGCATGAATATGAGTG    |
| Nkx2.1-RT-R | GATCTTGACCTGCGTGGGTGT    |
| Ascl1-RT-F  | GAAGATGAGCAAGGTGGAGAC    |
| Ascl1-RT-R  | TTGGAGTAGTTGGGGGAGATG    |
| Dlx1-RT-F   | GGCTGTGTTTATGGAGTTTGGG   |
| Dlx1-RT-R   | CCTGGGTTTACGGATCTTTTTC   |
| Dlx2-RT-F   | TGAACGGGAAGCCAAAGAAAGTC  |
| Dlx2-RT-R   | TCTGCGAAGGATGCAGAAGTG    |
| Gsx2-RT-F   | GCACAAGAAGGAGGGGAAAGG    |
| Gsx2-RT-R   | TTAGCCGAGGCAGGGGACAA     |
| Nkx2.2-RT-F | ACGGCAGATGTGTGAGGTTGAC   |
| Nkx2.2-RT-R | TGGGAGGGGTGCTAGTGGGTAA   |
| Dlx6-RT-F   | CATCCCCACCTGCCGAAAAAT    |
| Dlx6-RT-R   | CACCGATCCAACCTGCGTACA    |
| Lhx2-RT-F   | CGAGAAGAAGCTGATGTGTGG    |
| Lhx2-RT-R   | AGAGAGCAAGGAATGGGGAGA    |
| Gapdh-RT-F  | ACTCCACTCACGGCAAATTC     |
| Gapdh-RT-R  | TGGTTCACACCCATCACAAA     |
| Shh-ChIP-F  | TAAAGTGCAAAGAGGATGAGGGTC |
| Shh-ChIP-R  | TCGGGAATGTCTGAATCAGGTC   |
| Dlx2-ChIP-F | TACCTTGCAGGGTTGTTTTGA    |
| Dlx2-ChIP-R | TGCGGTGATGTAGGGGTTTAG    |
| Dlx5-ChIP-F | ATACTCTATCCATACCATCC     |
| Dlx5-ChIP-R | TTGTCGTCACAGTCTCCTTC     |

|              |                       |
|--------------|-----------------------|
| Ascl1-ChIP-F | CCTGTGCTCTATAAGAAAGG  |
| Ascl1-ChIP-R | CACTGGAACCAAAAGAACT   |
| Olig2-ChIP-F | TATTACAGACCGAGCCAACAC |
| Olig2-ChIP-R | CATCCTAAATCCTAGCCACTT |
